# Supplementary material for: Genotyping-by-Sequencing (GBS): A Novel, Efficient and Cost-Effective Genotyping Method for Cattle Using Next-Generation Sequencing
Source: PubMed Central journal article supplement (PMC3656875; doi:10.1371/journal.pone.0062137), 2013-05-17

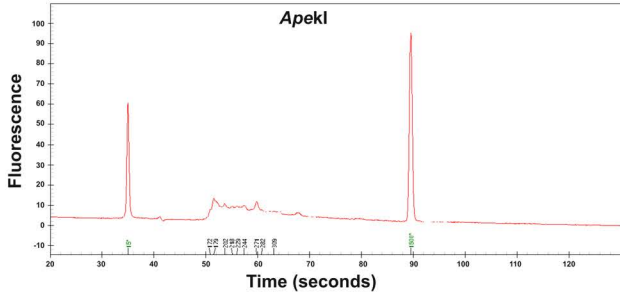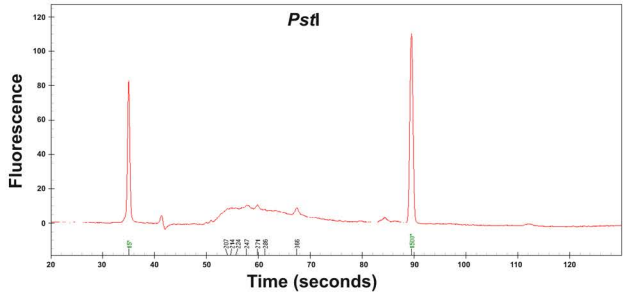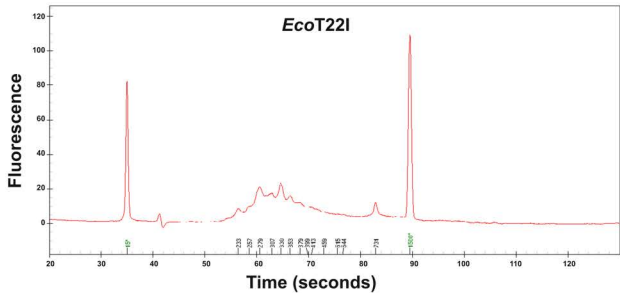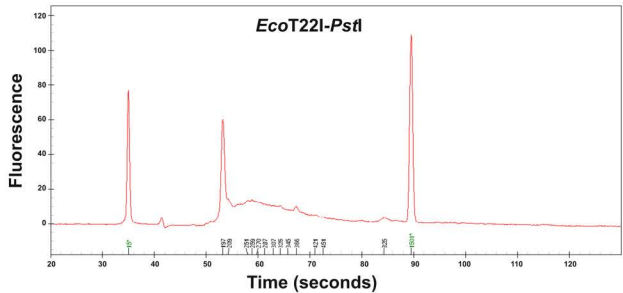

Supplement: pone.0062137.s001.pdf [file pone.0062137.s001.pdf]
